# Supplementary material for: The synthesis and mechanistic studies of a highly active nickel phosphide catalyst for naphthalene hydrodearomatization
Source: Royal Society of Chemistry journal article supplement (doi:10.1039/c7ra00250e), 2017-01-01
Supplement: c7ra00250e1.pdf [file c7ra00250e1.pdf]

## Supporting Information

### The synthesis and mechanistic studies of a highly active nickel phosphide catalyst for naphthalene hydrodearomatization

Guoxia Yun,<sup>a</sup> Qingxin Guan,<sup>\*a</sup> Wei Li<sup>\*ab</sup>

a. College of chemistry, Key laboratory of advanced energy materials chemistry (Ministry of Education), Nankai University, Tianjin, 300071, China.

b. Collaborative Innovation Center of Chemical Science and Engineering, Tianjin, 300071, China.

\*Corresponding author: weili@nankai.edu.cn, qingxinguan@nankai.edu.cn

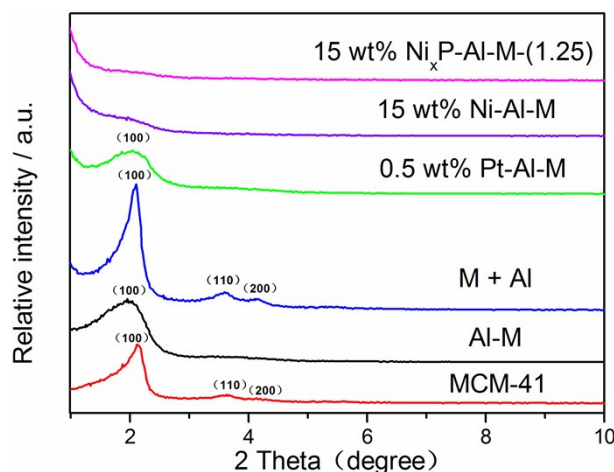

Fig. S1 Low-angle powder X-ray diffraction patterns of MCM-41, Al-M, physical mixture (M+Al) supports and the Pt-, Ni-, Ni<sub>x</sub>P-based catalysts.

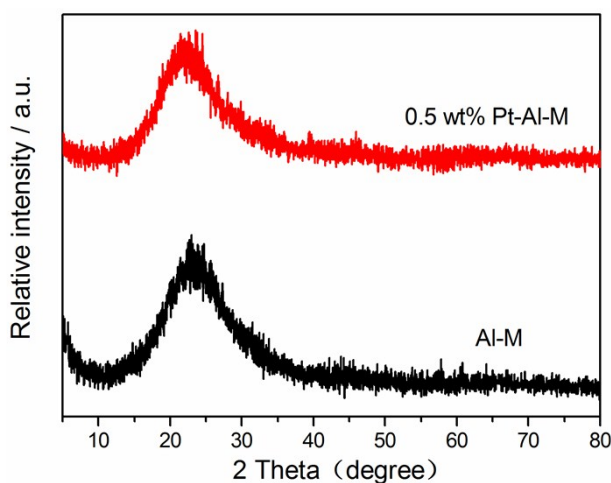

Fig. S2 XRD patterns of Al-M support along with the corresponding Pt-loaded catalyst.

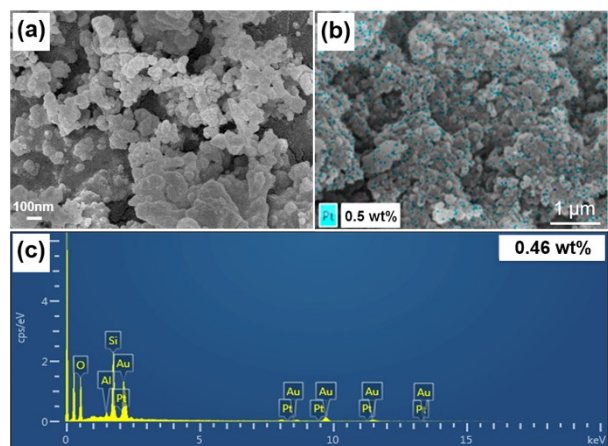

**Fig. S3** The SEM (a), mapping image (cyan dot refer to platinum atom) (b), and EDS (c) of 0.5 wt% Pt-Al-M catalyst.

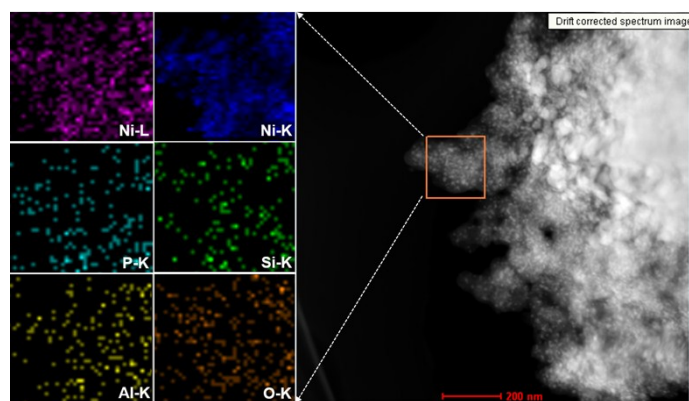

**Fig. S4** HAADF-STEM micrographs of 15 wt% Ni<sub>x</sub>P-Al-M-(1.25).

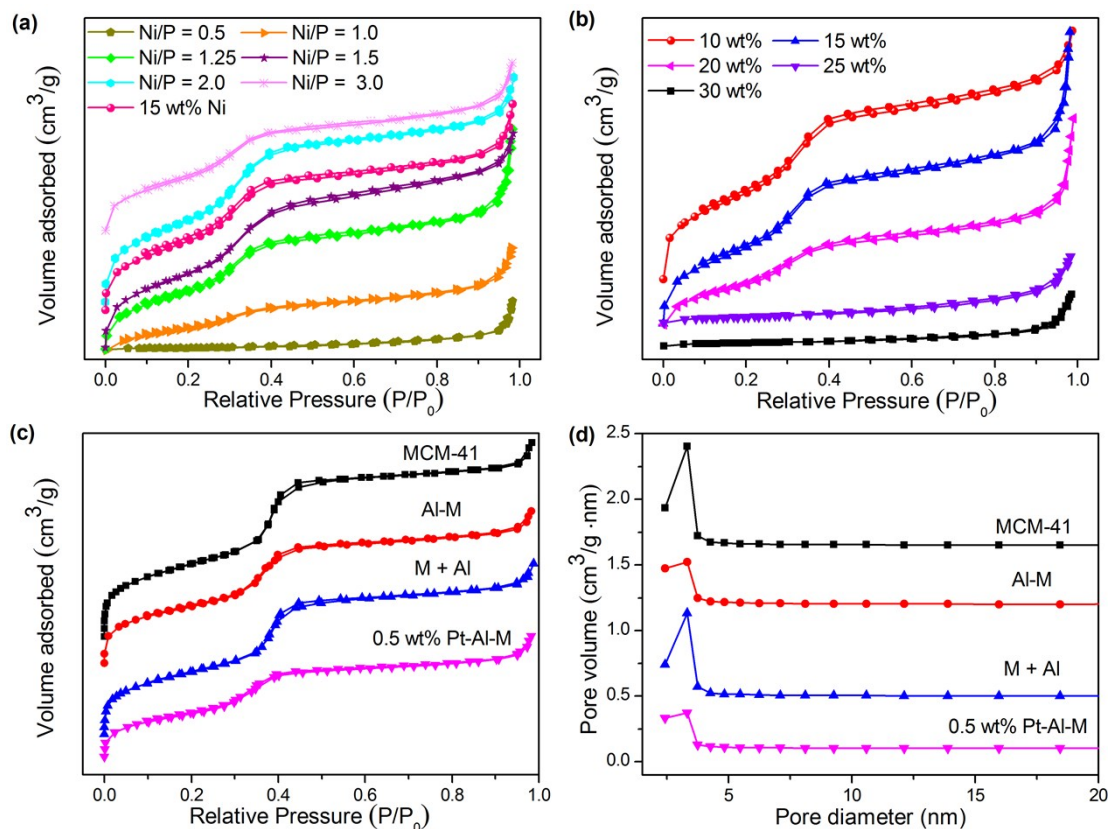

**Fig. S5** The  $N_2$  adsorption-desorption isotherms of (a) 15 wt%  $Ni_xP$ -Al-M with various initial Ni/P molar ratios, (b)  $Ni_xP$ -Al-M(1.25) with different  $Ni_xP$  loadings, (c) MCM-41, Al-M, physical mixture (M+Al) supports, 0.5 wt% Pt-Al-M catalyst and (d) the corresponding BJH pore size distributions of supports and 0.5 wt% Pt-Al-M catalyst.

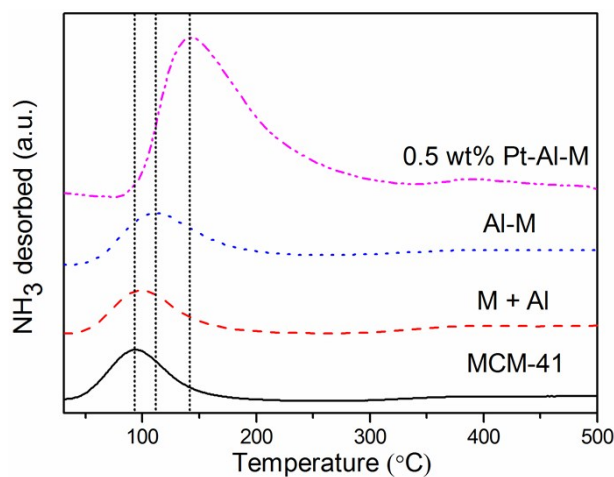

**Fig. S6** Temperature programmed desorption of ammonia ( $NH_3$ -TPD) profiles for supports MCM-41, physical mixture (M+Al), Al-M supports, and 0.5 wt% Pt-Al-M catalyst.

**Table S1**

Textural and structural properties of the different supports and prepared catalysts obtained from N<sub>2</sub> physisorption measurements.

| Samples                                            |                                        | S <sub>BET</sub> <sup>a</sup> (m <sup>2</sup> g <sup>-1</sup> ) | V <sub>BJH</sub> <sup>b</sup> (cm <sup>3</sup> g <sup>-1</sup> ) | D <sub>mp</sub> <sup>c</sup> (nm) | Average crystallite size <sup>d</sup> (nm) |
|----------------------------------------------------|----------------------------------------|-----------------------------------------------------------------|------------------------------------------------------------------|-----------------------------------|--------------------------------------------|
| Support                                            | MCM-41                                 | 893                                                             | 0.96                                                             | 3.3                               | -                                          |
|                                                    | Al-M                                   | 720                                                             | 0.79                                                             | 3.3                               | -                                          |
|                                                    | M+Al                                   | 777                                                             | 0.85                                                             | 3.3                               | -                                          |
| Catalysts with different loadings                  | 0.5 wt% Pt-Al-M-(1.25)                 | 595                                                             | 0.61                                                             | 2.4                               | -                                          |
|                                                    | 15 wt% Ni <sub>x</sub> P-MCM-41-(1.25) | 471                                                             | 0.40                                                             | 2.4                               | 16.85                                      |
|                                                    | 15 wt% Ni-Al-M-(1.25)                  | 420                                                             | 0.42                                                             | 2.4                               | 13.68                                      |
|                                                    | 10 wt% Ni <sub>x</sub> P-Al-M-(1.25)   | 387                                                             | 0.38                                                             | 2.4                               | -                                          |
|                                                    | 15 wt% Ni <sub>x</sub> P-Al-M-(1.25)   | 357                                                             | 0.44                                                             | 2.4                               | 15.35                                      |
|                                                    | 20 wt% Ni <sub>x</sub> P-Al-M-(1.25)   | 234                                                             | 0.32                                                             | 2.4                               | 23.43                                      |
|                                                    | 25 wt% Ni <sub>x</sub> P-Al-M-(1.25)   | 213                                                             | 0.18                                                             | 2.4                               | 17.46                                      |
|                                                    | 30 wt% Ni <sub>x</sub> P-Al-M-(1.25)   | 170                                                             | 0.18                                                             | 2.4                               | 26.62                                      |
|                                                    | 15 wt% Ni <sub>x</sub> P-Al-M-(0.5)    | 170                                                             | 0.18                                                             | 2.4                               | 23.69                                      |
|                                                    | 15 wt% Ni <sub>x</sub> P-Al-M-(1.0)    | 184                                                             | 0.22                                                             | 2.4                               | 18.27                                      |
| Catalysts with different initial Ni/P molar ratios | 15 wt% Ni <sub>x</sub> P-Al-M-(1.25)   | 357                                                             | 0.44                                                             | 2.4                               | 15.35                                      |
|                                                    | 15 wt% Ni <sub>x</sub> P-Al-M-(1.5)    | 433                                                             | 0.43                                                             | 2.4                               | 19.16                                      |
|                                                    | 15 wt% Ni <sub>x</sub> P-Al-M-(2.0)    | 473                                                             | 0.45                                                             | 2.4                               | 20.28                                      |
|                                                    | 15 wt% Ni <sub>x</sub> P-Al-M-(3.0)    | 492                                                             | 0.47                                                             | 2.4                               | 20.32                                      |

<sup>a</sup> BET surface area calculated from the adsorption branch of the N<sub>2</sub> isotherm.

<sup>b</sup> Total pore volumes calculated from the N<sub>2</sub> adsorption at relative pressure (P/P<sub>0</sub>) of 0.98.

<sup>c</sup> Mesopore diameter calculated from the adsorption branch of the N<sub>2</sub> isotherm using the BJH method.

<sup>d</sup> The crystallite size calculated from Scherrer's equation according to the full width at half maximum (FWHM) applied to the most intense diffraction peak.

-: The species was not detected.

**Table S2**

Observed metal content and Ni/P molar ratio of catalysts compared to theoretical Ni/P using ICP-OES.

| Samples                            | Metal content (wt.%) |      | Theoretical Ni/P molar ratio | Observed Ni/P molar ratio |
|------------------------------------|----------------------|------|------------------------------|---------------------------|
|                                    | Al                   | Ni   |                              |                           |
|                                    | Al-M                 | 4.7  | -                            | -                         |
| 15 % Ni <sub>x</sub> P-Al-M-(0.5)  | 4.7                  | 8.95 | 0.5                          | 0.84                      |
| 15 % Ni <sub>x</sub> P-Al-M-(1.0)  | 4.7                  | 10.3 | 1.0                          | 1.81                      |
| 15 % Ni <sub>x</sub> P-Al-M-(1.25) | 4.7                  | 10.0 | 1.25                         | 2.14                      |
| 15 % Ni <sub>x</sub> P-Al-M-(1.5)  | 4.7                  | 10.7 | 1.5                          | 2.60                      |
| 15 % Ni <sub>x</sub> P-Al-M-(2.0)  | 4.7                  | 11.3 | 2.0                          | 3.54                      |
| 15 % Ni <sub>x</sub> P-Al-M-(3.0)  | 4.7                  | 11.0 | 3.0                          | 5.12                      |

-:The species was not detected.

**Table S3**

XPS analysis results along with (Ni/P) nominal atomic ratio.

| Samples                                | superficial atomic ratio(Ni/P) | Ni (wt %) | P (wt %) | Binding energy (eV)  |                  | Binding energy (eV)           |                 |
|----------------------------------------|--------------------------------|-----------|----------|----------------------|------------------|-------------------------------|-----------------|
|                                        |                                |           |          | Ni 2p <sub>3/2</sub> |                  | P 2p                          |                 |
|                                        |                                |           |          | Ni <sup>2+</sup>     | Ni <sup>δ+</sup> | PO <sub>4</sub> <sup>3-</sup> | P <sup>δ-</sup> |
| 15 wt% Ni <sub>x</sub> P-MCM-41-(1.25) | 0.48                           | 1.2       | 2.5      | 856.4                | 852.3            | 134.5                         | 129.5           |
| 15 wt% Ni <sub>x</sub> P-Al-M-(1.25)   | 0.53                           | 0.8       | 1.5      | 856.4                | 852.3            | 134.5                         | 129.5           |

**Table S4**The corresponding NH<sub>3</sub>-TPD characterization, CO chemisorption uptakes, and turnover frequency (TOF) of the samples.

| Samples                                | NH <sub>3</sub> -TPD <sup>a</sup> |                                |                                                      | CO uptakes (μmol g <sup>-1</sup> ) | TOF (s <sup>-1</sup> ) |
|----------------------------------------|-----------------------------------|--------------------------------|------------------------------------------------------|------------------------------------|------------------------|
|                                        | Peak temperature (°C)             | Area percentage in parenthesis | Total acidity normalized to the acidity of pure Al-M |                                    |                        |
| MCM-41                                 | 94                                | (100%)                         | 0.66                                                 | -                                  | -                      |
| Al+M                                   | 98                                | (100%)                         | 0.62                                                 | -                                  | -                      |
| Al-M                                   | 115                               | (100%)                         | 1.00                                                 | -                                  | -                      |
| 15 wt% Ni <sub>x</sub> P-MCM-41-(1.25) | 116                               | (100%)                         | 0.28                                                 | 2.8                                | 0.42                   |
| 15 wt% Ni-Al-M-(1.25)                  | 112                               | (65%);                         | 0.81                                                 | 3.1                                | 0.44                   |
|                                        | 425                               | (45%)                          | 0.56                                                 |                                    |                        |
| 15 wt% Ni <sub>x</sub> P-Al-M-(0.5)    | -                                 | -                              | -                                                    | 2.8                                | 0.43                   |
| 15 wt% Ni <sub>x</sub> P-Al-           | 117                               | (100%)                         | 1.48                                                 | 3.0                                | 0.43                   |

|                              |     |        |      |     |      |
|------------------------------|-----|--------|------|-----|------|
| M-(1.0)                      |     |        |      |     |      |
| 15 wt% Ni <sub>x</sub> P-Al- | 112 | (100%) | 1.47 | 3.1 | 0.44 |
| M-(1.25)                     |     |        |      |     |      |
| 15 wt% Ni <sub>x</sub> P-Al- | 105 | (100%) | 1.19 | 3.0 | 0.44 |
| M-(1.5)                      |     |        |      |     |      |
| 15 wt% Ni <sub>x</sub> P-Al- | 99  | (100%) | 1.06 | 2.9 | 0.43 |
| M-(2.0)                      |     |        |      |     |      |
| 15 wt% Ni <sub>x</sub> P-Al- | 108 | (100%) | 0.64 | 2.8 | 0.43 |
| M-(3.0)                      |     |        |      |     |      |

<sup>a</sup> As determined by the TPD-NH<sub>3</sub> analysis and normalized to the acidity of pure Al-M.

-: The species was not detected.

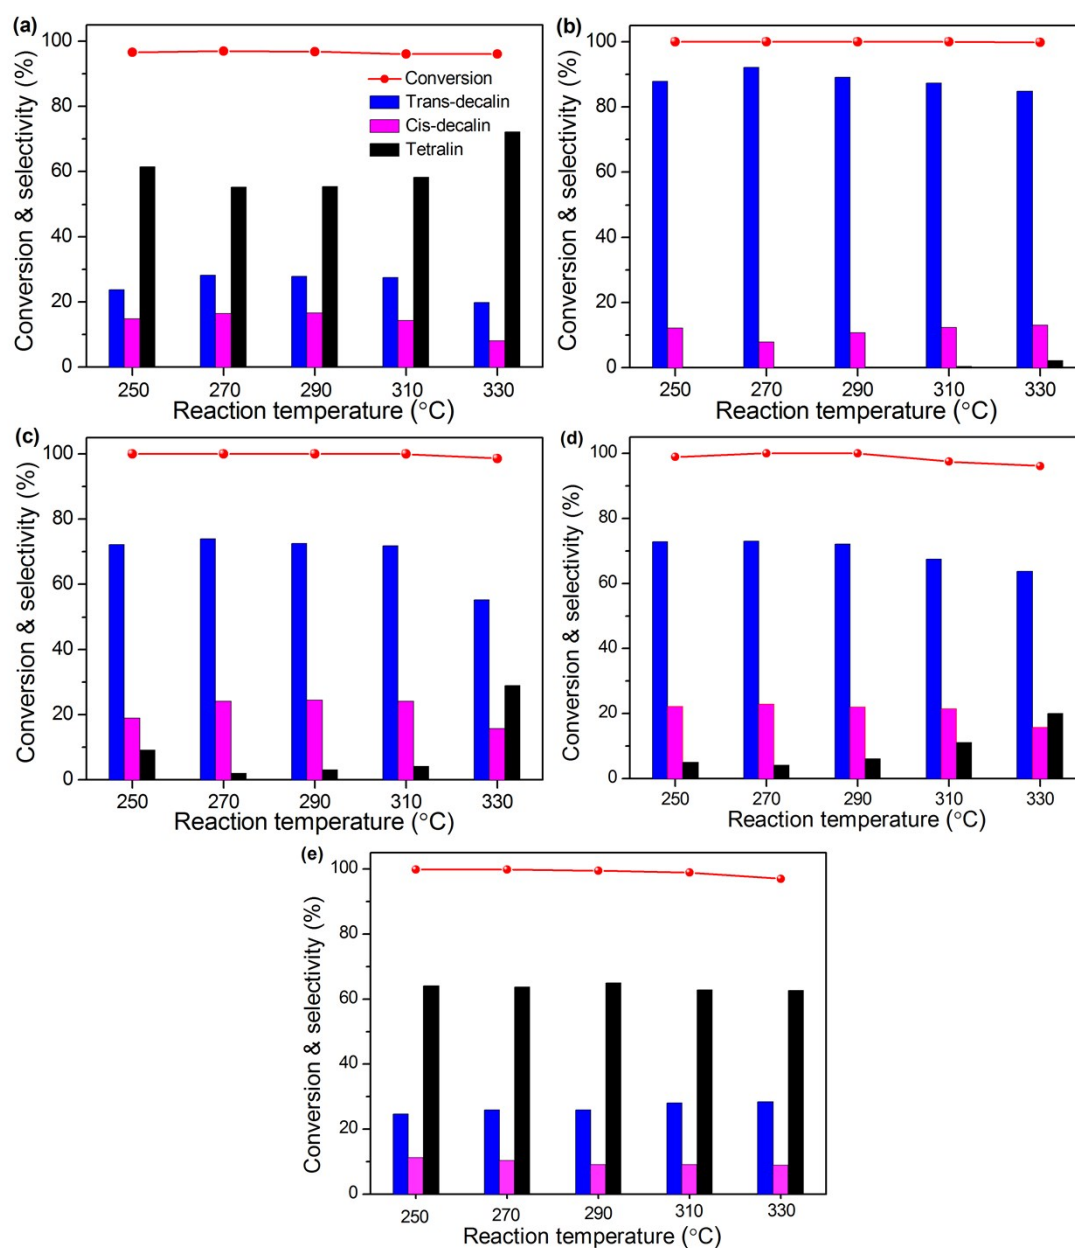

**Fig. S7** Product distribution of naphthalene HYD over Ni<sub>x</sub>P-Al-M(1.25) with different Ni<sub>x</sub>P loadings as a function of temperature, (a) 10 wt%, (b) 15 wt%, (c) 20 wt%, (d) 25 wt%, and (e) 30 wt%.

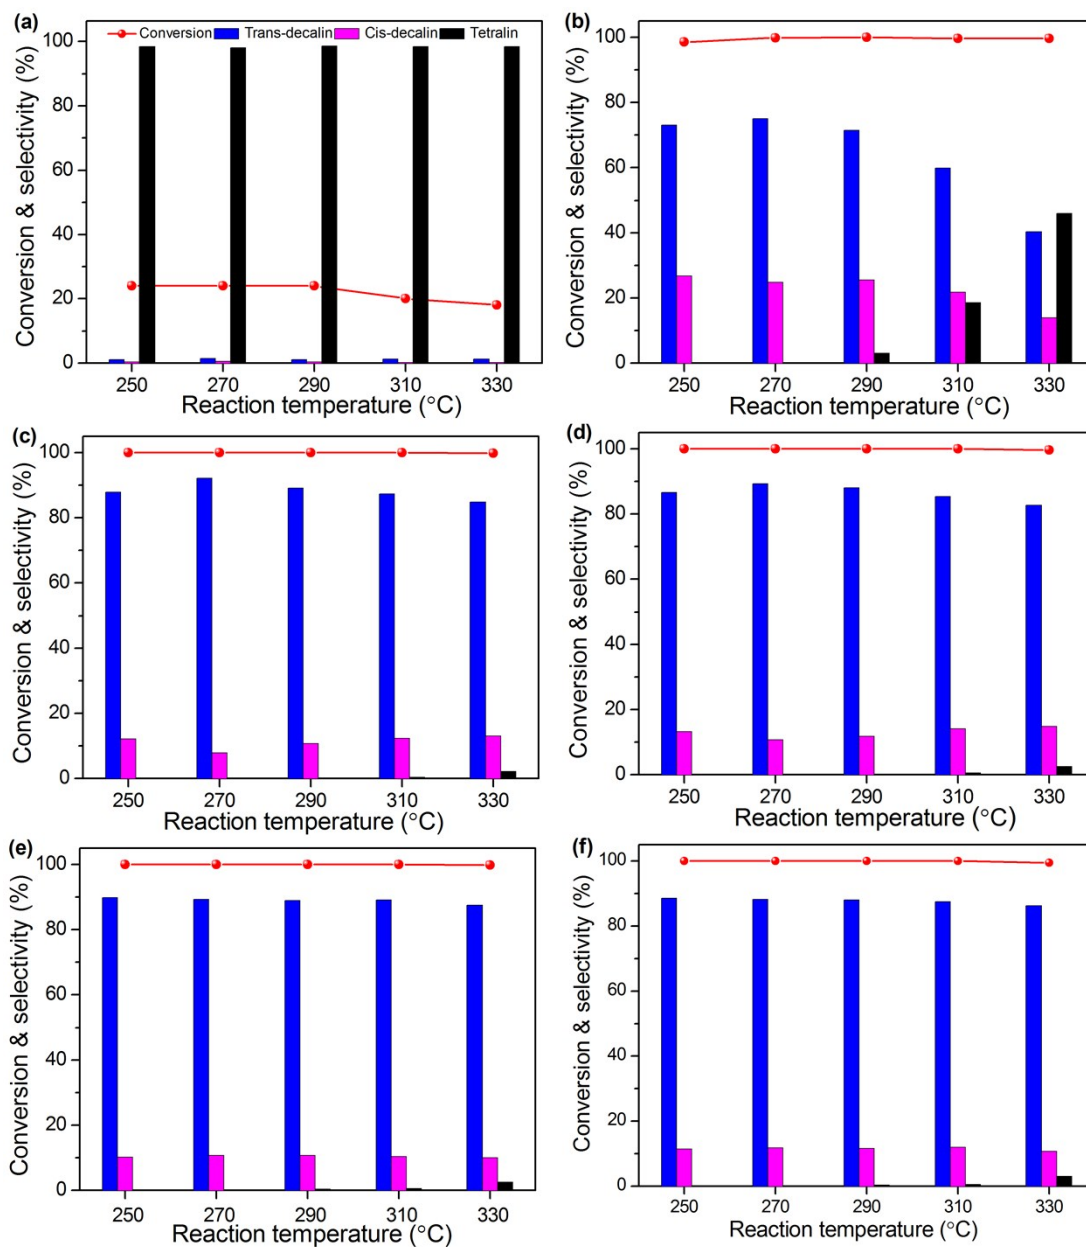

**Fig. S8** Product distribution of naphthalene HYD over 15 wt% Ni<sub>x</sub>P-Al-M with the precursor of different Ni/P molar ratio as a function of temperature. (a) 0.5, (b) 1.0, (c) 1.25, (d) 2.0, (e) 2.0, and (f) 3.0.

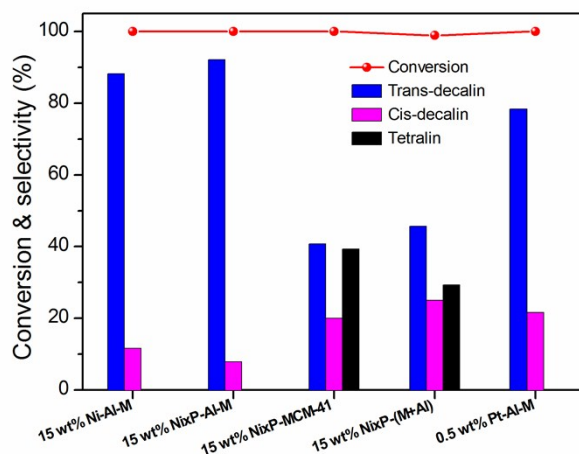

**Fig. S9** Naphthalene conversion and product selectivities with reaction temperature of 270 °C over Ni, Ni<sub>x</sub>P, and Pt supported catalysts.

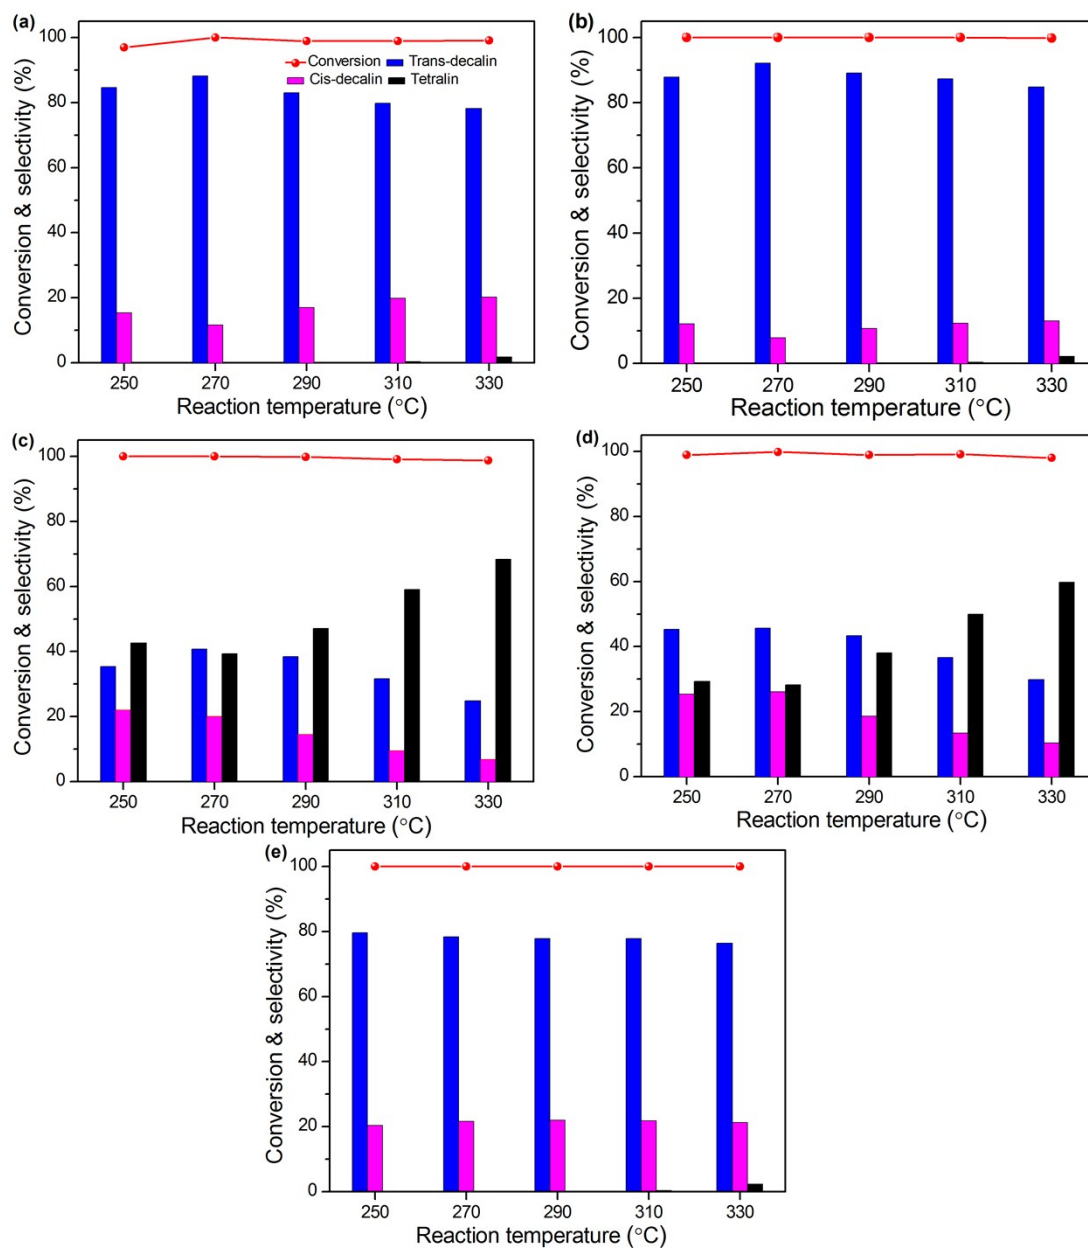

**Fig. S10** Product distribution of naphthalene HYD over different catalysts as a function of temperature. (a) 15 wt% Ni-Al-M, (b) 15 wt% Ni<sub>x</sub>P-Al-M, (c) 15 wt% Ni<sub>x</sub>P-MCM-41, (d) 15 wt% Ni<sub>x</sub>P-(M+Al), and (e) 0.5 wt% Pt-Al-M.



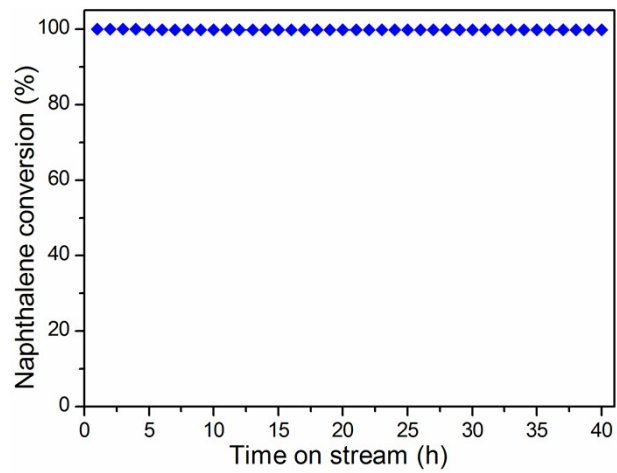

**Fig. S11** Long-term stability test with reaction temperature at 270 °C for the 15 wt% Ni<sub>x</sub>P-Al-M-(1.25) catalyst.
